# Supplementary material for: Whole genome sequencing identifies rare genetic variants in familial pancreatic cancer patients
Source: PubMed Central journal article supplement — Ann Hum Genet. 2022 Mar 21;86(4):195–206. doi: 10.1111/ahg.12464 (PMC9313800; doi:10.1111/ahg.12464), 2022-03-21

**Supplementary Figure S1. Scatter plot with fitted regression line displaying the correlation between PHRED score and number of times being predicted as damaging out of six predictors for the identified PTVs.**

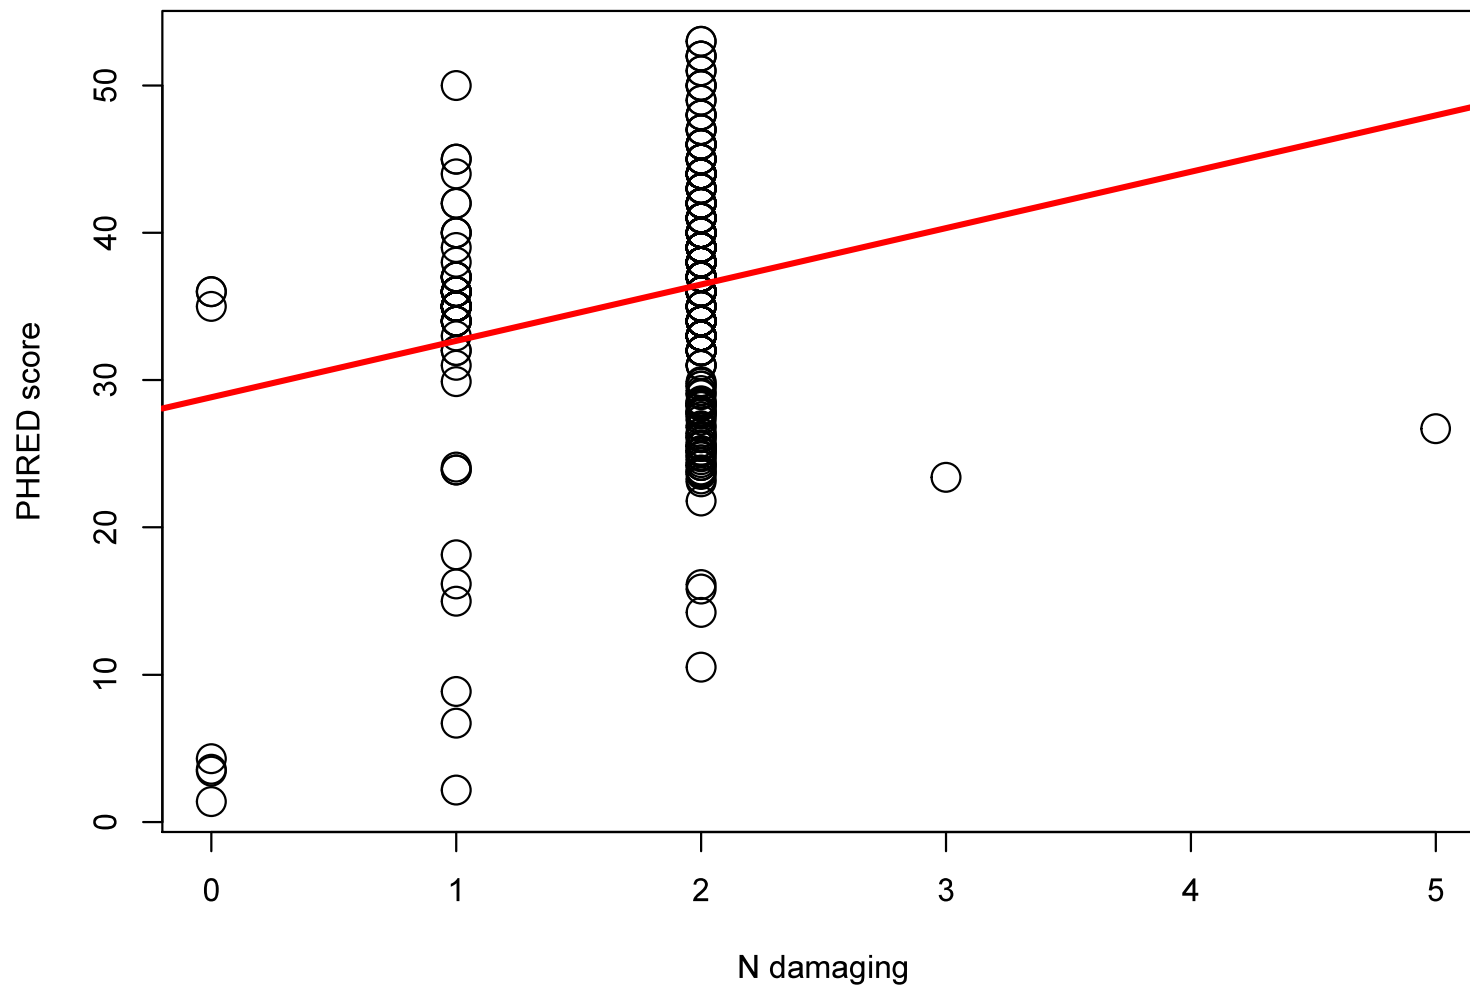

Supplement: AHG-86-195-s001.pdf [file AHG-86-195-s001.pdf]
