# Supplementary material for: Whole genome sequencing identifies rare genetic variants in familial pancreatic cancer patients
Source: PubMed Central journal article supplement — Ann Hum Genet. 2022 Mar 21;86(4):195–206. doi: 10.1111/ahg.12464 (PMC9313800; doi:10.1111/ahg.12464), 2022-03-21
Supplement: AHG-86-195-s006.pdf [file AHG-86-195-s006.pdf]

Supplementary Figure S2. Overlap of genes among the top ten pathways enriched by PTV genes

| Entrez Gene Id | Gene Symbol | REACTOME_EXTRACELLULAR_MATRIX_ORGANIZATION | REACTOME_RHO_GTPASE_CYCLE | REACTOME_RHO_GTPASE_CYCLE | REACTOME_RNA_POLYMERASE_II_TRANSCRIPTION | REACTOME_SIGNALING_BY_RHO_GTPASES_MIRO_GTPASES_AND_RHOBTB3 | MAGA_MATRISOME | WP_INTEGRATED_BREAST_CANCER_PATHWAY | REACTOME_COLLAGEN_FORMATION | REACTOME_SIGNALING_BY_RECEPTOR_TYROSINE_KINASES | REACTOME_METABOLISM_OF_RNA | Gene Description                                                                                               |
|----------------|-------------|--------------------------------------------|---------------------------|---------------------------|------------------------------------------|------------------------------------------------------------|----------------|-------------------------------------|-----------------------------|-------------------------------------------------|----------------------------|----------------------------------------------------------------------------------------------------------------|
| 4312           | MMP1        |                                            |                           |                           |                                          |                                                            |                |                                     |                             |                                                 |                            | matrix metalloproteinase 1 [Source:HGNC Symbol;Acc:HGNC:7155]                                                  |
| 1281           | COL3A1      |                                            |                           |                           |                                          |                                                            |                |                                     |                             |                                                 |                            | collagen type III alpha 1 chain [Source:HGNC Symbol;Acc:HGNC:2201]                                             |
| 1284           | COL4A2      |                                            |                           |                           |                                          |                                                            |                |                                     |                             |                                                 |                            | collagen type IV alpha 2 chain [Source:HGNC Symbol;Acc:HGNC:2203]                                              |
| 1289           | COL5A1      |                                            |                           |                           |                                          |                                                            |                |                                     |                             |                                                 |                            | collagen type V alpha 1 chain [Source:HGNC Symbol;Acc:HGNC:2209]                                               |
| 1297           | COL9A1      |                                            |                           |                           |                                          |                                                            |                |                                     |                             |                                                 |                            | collagen type IX alpha 1 chain [Source:HGNC Symbol;Acc:HGNC:2217]                                              |
| 9509           | ADAMTS2     |                                            |                           |                           |                                          |                                                            |                |                                     |                             |                                                 |                            | ADAM metalloproteinase with thrombospondin type 1 motif 2 [Source:HGNC Symbol;Acc:HGNC:218]                    |
| 7093           | TLL2        |                                            |                           |                           |                                          |                                                            |                |                                     |                             |                                                 |                            | tolloid like 2 [Source:HGNC Symbol;Acc:HGNC:11844]                                                             |
| 4316           | MMP7        |                                            |                           |                           |                                          |                                                            |                |                                     |                             |                                                 |                            | matrix metalloproteinase 7 [Source:HGNC Symbol;Acc:HGNC:7174]                                                  |
| 4017           | LOXL2       |                                            |                           |                           |                                          |                                                            |                |                                     |                             |                                                 |                            | lysyl oxidase like 2 [Source:HGNC Symbol;Acc:HGNC:6666]                                                        |
| 1307           | COL16A1     |                                            |                           |                           |                                          |                                                            |                |                                     |                             |                                                 |                            | collagen type XVI alpha 1 chain [Source:HGNC Symbol;Acc:HGNC:2193]                                             |
| 340267         | COL28A1     |                                            |                           |                           |                                          |                                                            |                |                                     |                             |                                                 |                            | collagen type XXVIII alpha 1 chain [Source:HGNC Symbol;Acc:HGNC:22442]                                         |
| 57642          | COL20A1     |                                            |                           |                           |                                          |                                                            |                |                                     |                             |                                                 |                            | collagen type XX alpha 1 chain [Source:HGNC Symbol;Acc:HGNC:14670]                                             |
| 284217         | LAMA1       |                                            |                           |                           |                                          |                                                            |                |                                     |                             |                                                 |                            | laminin subunit alpha 1 [Source:HGNC Symbol;Acc:HGNC:6481]                                                     |
| 10319          | LAMC3       |                                            |                           |                           |                                          |                                                            |                |                                     |                             |                                                 |                            | laminin subunit gamma 3 [Source:HGNC Symbol;Acc:HGNC:6494]                                                     |
| 2200           | FBN1        |                                            |                           |                           |                                          |                                                            |                |                                     |                             |                                                 |                            | fibrillin 1 [Source:HGNC Symbol;Acc:HGNC:3603]                                                                 |
| 2              | A2M         |                                            |                           |                           |                                          |                                                            |                |                                     |                             |                                                 |                            | alpha-2-macroglobulin [Source:HGNC Symbol;Acc:HGNC:7]                                                          |
| 64386          | MMP25       |                                            |                           |                           |                                          |                                                            |                |                                     |                             |                                                 |                            | matrix metalloproteinase 25 [Source:HGNC Symbol;Acc:HGNC:14246]                                                |
| 63923          | TNN         |                                            |                           |                           |                                          |                                                            |                |                                     |                             |                                                 |                            | tenascin N [Source:HGNC Symbol;Acc:HGNC:22942]                                                                 |
| 84034          | EMILIN2     |                                            |                           |                           |                                          |                                                            |                |                                     |                             |                                                 |                            | elastin microfibril interfacer 2 [Source:HGNC Symbol;Acc:HGNC:19881]                                           |
| 23127          | COLGALT2    |                                            |                           |                           |                                          |                                                            |                |                                     |                             |                                                 |                            | collagen beta(1-O)galactosyltransferase 2 [Source:HGNC Symbol;Acc:HGNC:16790]                                  |
| 3691           | ITGB4       |                                            |                           |                           |                                          |                                                            |                |                                     |                             |                                                 |                            | integrin subunit beta 4 [Source:HGNC Symbol;Acc:HGNC:6158]                                                     |
| 826            | CAPNS1      |                                            |                           |                           |                                          |                                                            |                |                                     |                             |                                                 |                            | calpain small subunit 1 [Source:HGNC Symbol;Acc:HGNC:1481]                                                     |
| 10753          | CAPN9       |                                            |                           |                           |                                          |                                                            |                |                                     |                             |                                                 |                            | calpain 9 [Source:HGNC Symbol;Acc:HGNC:1486]                                                                   |
| 3818           | KLKB1       |                                            |                           |                           |                                          |                                                            |                |                                     |                             |                                                 |                            | kallikrein B1 [Source:HGNC Symbol;Acc:HGNC:6371]                                                               |
| 3682           | ITGAE       |                                            |                           |                           |                                          |                                                            |                |                                     |                             |                                                 |                            | integrin subunit alpha E [Source:HGNC Symbol;Acc:HGNC:6147]                                                    |
| 8174           | MADCAM1     |                                            |                           |                           |                                          |                                                            |                |                                     |                             |                                                 |                            | mucosal vascular addressin cell adhesion molecule 1 [Source:HGNC Symbol;Acc:HGNC:6765]                         |
| 6093           | ROCK1       |                                            |                           |                           |                                          |                                                            |                |                                     |                             |                                                 |                            | Rho associated coiled-coil containing protein kinase 1 [Source:HGNC Symbol;Acc:HGNC:10251]                     |
| 1729           | DIAPH1      |                                            |                           |                           |                                          |                                                            |                |                                     |                             |                                                 |                            | diaphanous related formin 1 [Source:HGNC Symbol;Acc:HGNC:2876]                                                 |
| 5825           | ARCD3       |                                            |                           |                           |                                          |                                                            |                |                                     |                             |                                                 |                            | ATP binding cassette subfamily D member 3 [Source:HGNC Symbol;Acc:HGNC:67]                                     |
| 128239         | IQGAP3      |                                            |                           |                           |                                          |                                                            |                |                                     |                             |                                                 |                            | IQ motif containing GTPase activating protein 3 [Source:HGNC Symbol;Acc:HGNC:20669]                            |
| 11113          | CIT         |                                            |                           |                           |                                          |                                                            |                |                                     |                             |                                                 |                            | citron rho-interacting serine/threonine kinase [Source:HGNC Symbol;Acc:HGNC:1985]                              |
| 4162           | MCAM        |                                            |                           |                           |                                          |                                                            |                |                                     |                             |                                                 |                            | melanoma cell adhesion molecule [Source:HGNC Symbol;Acc:HGNC:6934]                                             |
| 116984         | ARAP2       |                                            |                           |                           |                                          |                                                            |                |                                     |                             |                                                 |                            | "ArfGAP with RhoGAP domain, ankyrin repeat and PH domain 2 [Source:HGNC Symbol;Acc:HGNC:16924]"                |
| 80243          | PREX2       |                                            |                           |                           |                                          |                                                            |                |                                     |                             |                                                 |                            | "phosphatidylinositol-3,4,5-trisphosphate dependent Rac exchange factor 2 [Source:HGNC Symbol;Acc:HGNC:22950]" |
| 26030          | PLEKHG3     |                                            |                           |                           |                                          |                                                            |                |                                     |                             |                                                 |                            | pleckstrin homology and RhoGEF domain containing G3 [Source:HGNC Symbol;Acc:HGNC:20364]                        |
| 10160          | FARP1       |                                            |                           |                           |                                          |                                                            |                |                                     |                             |                                                 |                            | "FERM, ARH/RhoGEF and pleckstrin domain protein 1 [Source:HGNC Symbol;Acc:HGNC:3591]"                          |
| 9912           | ARHGAP44    |                                            |                           |                           |                                          |                                                            |                |                                     |                             |                                                 |                            | Rho GTPase activating protein 44 [Source:HGNC Symbol;Acc:HGNC:29096]                                           |
| 10114          | FAM13A      |                                            |                           |                           |                                          |                                                            |                |                                     |                             |                                                 |                            | family with sequence similarity 13 member A [Source:HGNC Symbol;Acc:HGNC:19367]                                |
| 5099           | PCDH7       |                                            |                           |                           |                                          |                                                            |                |                                     |                             |                                                 |                            | protocadherin 7 [Source:HGNC Symbol;Acc:HGNC:8659]                                                             |
| 29941          | PKN3        |                                            |                           |                           |                                          |                                                            |                |                                     |                             |                                                 |                            | protein kinase N3 [Source:HGNC Symbol;Acc:HGNC:17999]                                                          |
| 93063          | ARHGAP18    |                                            |                           |                           |                                          |                                                            |                |                                     |                             |                                                 |                            | Rho GTPase activating protein 18 [Source:HGNC Symbol;Acc:HGNC:21035]                                           |
| 114822         | RHPN1       |                                            |                           |                           |                                          |                                                            |                |                                     |                             |                                                 |                            | rhopilin Rho GTPase binding protein 1 [Source:HGNC Symbol;Acc:HGNC:19973]                                      |
| 84033          | OBSCN       |                                            |                           |                           |                                          |                                                            |                |                                     |                             |                                                 |                            | "obscurin, cytoskeletal calmodulin and titin-interacting RhoGEF [Source:HGNC Symbol;Acc:HGNC:15719]"           |
| 9824           | ARHGAP11A   |                                            |                           |                           |                                          |                                                            |                |                                     |                             |                                                 |                            | Rho GTPase activating protein 11A [Source:HGNC Symbol;Acc:HGNC:15783]                                          |
| 23129          | PLXND1      |                                            |                           |                           |                                          |                                                            |                |                                     |                             |                                                 |                            | plexin D1 [Source:HGNC Symbol;Acc:HGNC:9107]                                                                   |
| 10811          | NOXA1       |                                            |                           |                           |                                          |                                                            |                |                                     |                             |                                                 |                            | NADPH oxidase activator 1 [Source:HGNC Symbol;Acc:HGNC:10668]                                                  |
| 2889           | RAPGEF1     |                                            |                           |                           |                                          |                                                            |                |                                     |                             |                                                 |                            | Rap guanine nucleotide exchange factor 1 [Source:HGNC Symbol;Acc:HGNC:4568]                                    |
| 1793           | DOCK1       |                                            |                           |                           |                                          |                                                            |                |                                     |                             |                                                 |                            | dedicator of cytokinesis 1 [Source:HGNC Symbol;Acc:HGNC:2987]                                                  |
| 23048          | FNBP1       |                                            |                           |                           |                                          |                                                            |                |                                     |                             |                                                 |                            | formin binding protein 1 [Source:HGNC Symbol;Acc:HGNC:17069]                                                   |
| 2289           | RND1        |                                            |                           |                           |                                          |                                                            |                |                                     |                             |                                                 |                            | Rho family GTPase 1 [Source:HGNC Symbol;Acc:HGNC:18314]                                                        |
| 23348          | DOCK9       |                                            |                           |                           |                                          |                                                            |                |                                     |                             |                                                 |                            | dedicator of cytokinesis 9 [Source:HGNC Symbol;Acc:HGNC:14132]                                                 |
| 752            | FMNL1       |                                            |                           |                           |                                          |                                                            |                |                                     |                             |                                                 |                            | formin like 1 [Source:HGNC Symbol;Acc:HGNC:1212]                                                               |
| 84904          | ARHGAP39    |                                            |                           |                           |                                          |                                                            |                |                                     |                             |                                                 |                            | Rho guanine nucleotide exchange factor 39 [Source:HGNC Symbol;Acc:HGNC:25909]                                  |
| 27237          | ARHGAP16    |                                            |                           |                           |                                          |                                                            |                |                                     |                             |                                                 |                            | Rho guanine nucleotide exchange factor 16 [Source:HGNC Symbol;Acc:HGNC:15515]                                  |
| 79180          | EFHD2       |                                            |                           |                           |                                          |                                                            |                |                                     |                             |                                                 |                            | EF-hand domain family member D2 [Source:HGNC Symbol;Acc:HGNC:28670]                                            |
| 79834          | PEAK1       |                                            |                           |                           |                                          |                                                            |                |                                     |                             |                                                 |                            | pseudopodium enriched atypical kinase 1 [Source:HGNC Symbol;Acc:HGNC:29431]                                    |
| 57473          | ZNF512B     |                                            |                           |                           |                                          |                                                            |                |                                     |                             |                                                 |                            | zinc finger protein 512B [Source:HGNC Symbol;Acc:HGNC:29212]                                                   |
| 5515           | PPP2CA      |                                            |                           |                           |                                          |                                                            |                |                                     |                             |                                                 |                            | protein phosphatase 2 catalytic subunit alpha [Source:HGNC Symbol;Acc:HGNC:9299]                               |
| 2810           | SFN         |                                            |                           |                           |                                          |                                                            |                |                                     |                             |                                                 |                            | stratifin [Source:HGNC Symbol;Acc:HGNC:10773]                                                                  |
| 3549           | IHH         |                                            |                           |                           |                                          |                                                            |                |                                     |                             |                                                 |                            | Indian hedgehog signaling molecule [Source:HGNC Symbol;Acc:HGNC:5956]                                          |
| 641            | BLM         |                                            |                           |                           |                                          |                                                            |                |                                     |                             |                                                 |                            | BLM RecQ like helicase [Source:HGNC Symbol;Acc:HGNC:1058]                                                      |
| 6790           | AURKA       |                                            |                           |                           |                                          |                                                            |                |                                     |                             |                                                 |                            | aurora kinase A [Source:HGNC Symbol;Acc:HGNC:11393]                                                            |
| 5371           | PML         |                                            |                           |                           |                                          |                                                            |                |                                     |                             |                                                 |                            | PML nuclear body scaffold [Source:HGNC Symbol;Acc:HGNC:9113]                                                   |
| 472            | ATM         |                                            |                           |                           |                                          |                                                            |                |                                     |                             |                                                 |                            | ATM serine/threonine kinase [Source:HGNC Symbol;Acc:HGNC:795]                                                  |
| 637            | BID         |                                            |                           |                           |                                          |                                                            |                |                                     |                             |                                                 |                            | BH3 interacting domain death agonist [Source:HGNC Symbol;Acc:HGNC:1050]                                        |
| 2962           | GTF2F1      |                                            |                           |                           |                                          |                                                            |                |                                     |                             |                                                 |                            | general transcription factor IIF subunit 1 [Source:HGNC Symbol;Acc:HGNC:4652]                                  |
| 4686           | NCBP1       |                                            |                           |                           |                                          |                                                            |                |                                     |                             |                                                 |                            | nuclear cap binding protein subunit 1 [Source:HGNC Symbol;Acc:HGNC:7658]                                       |
| 253260         | RICTOR      |                                            |                           |                           |                                          |                                                            |                |                                     |                             |                                                 |                            | RPTOR independent companion of MTOR complex 2 [Source:HGNC Symbol;Acc:HGNC:28611]                              |
| 11059          | WWP1        |                                            |                           |                           |                                          |                                                            |                |                                     |                             |                                                 |                            | WW domain containing E3 ubiquitin protein ligase 1 [Source:HGNC Symbol;Acc:HGNC:17004]                         |
| 5707           | PSMD1       |                                            |                           |                           |                                          |                                                            |                |                                     |                             |                                                 |                            | "proteasome 26S subunit, non-ATPase 1 [Source:HGNC Symbol;Acc:HGNC:9554]"                                      |
| 80349          | WDR61       |                                            |                           |                           |                                          |                                                            |                |                                     |                             |                                                 |                            | WD repeat domain 61 [Source:HGNC Symbol;Acc:HGNC:30300]                                                        |
| 4848           | CNOT2       |                                            |                           |                           |                                          |                                                            |                |                                     |                             |                                                 |                            | CCR4-NOT transcription complex subunit 2 [Source:HGNC Symbol;Acc:HGNC:7878]                                    |
| 4850           | CNOT4       |                                            |                           |                           |                                          |                                                            |                |                                     |                             |                                                 |                            | CCR4-NOT transcription complex subunit 4 [Source:HGNC Symbol;Acc:HGNC:7880]                                    |
| 6430           | SRSF5       |                                            |                           |                           |                                          |                                                            |                |                                     |                             |                                                 |                            | serine and arginine rich splicing factor 5 [Source:HGNC Symbol;Acc:HGNC:10787]                                 |
| 55339          | WDR33       |                                            |                           |                           |                                          |                                                            |                |                                     |                             |                                                 |                            | WD repeat domain 33 [Source:HGNC Symbol;Acc:HGNC:25651]                                                        |
